# Supplementary material for: Up State of the SARS-COV-2 Spike Homotrimer Favors an Increased Virulence for New Variants
Source: PubMed Central journal article supplement (PMC8757851; doi:10.3389/fmedt.2021.694347), 2021-06-30
Supplement: Data_Sheet_1.pdf [file Data_Sheet_1.pdf]

## Sequences alignment of SARS-CoV-2 and SARS-CoV-2' RBD (S1 subunit) proteins

|                      |     |                                                     |     |
|----------------------|-----|-----------------------------------------------------|-----|
| SARS-CoV-2 wt        | 1   | ITNLCPFGEVFNATRFASVYAWNRRKISNCVADYSVLYNSASFSTFKCYG  | 50  |
|                      |     |                                                     |     |
| SARS-CoV-2 (B.1.351) | 1   | ITNLCPFGEVFNATRFASVYAWNRRKISNCVADYSVLYNSASFSTFKCYG  | 50  |
| SARS-CoV-2 wt        | 51  | VSPTKLNLDLCTNVIYADSFVIRGDEVRQIAPGQTGKIADYNYKLPDDFTG | 100 |
|                      |     |                                                     |     |
| SARS-CoV-2 (B.1.351) | 51  | VSPTKLNLDLCTNVIYADSFVIRGDEVRQIAPGQTGNIADYNYKLPDDFTG | 100 |
| SARS-CoV-2 wt        | 101 | CVIAWNSNNLDSKVGGNVNYLYRFRKSNLKPFERDISTEIQAGSTPCN    | 150 |
|                      |     |                                                     |     |
| SARS-CoV-2 (B.1.351) | 101 | CVIAWNSNNLDSKVGGNVNYLYRFRKSNLKPFERDISTEIQAGSTPCN    | 150 |
| SARS-CoV-2 wt        | 151 | GVEGFNCYFPLQSYGFQPTNGVGYQPYRVVLSFELLHAPAT           | 192 |
|                      |     | :                                                   |     |
| SARS-CoV-2 (B.1.351) | 151 | GVKGFNCYFPLQSYGFQPTYGVGYQPYRVVLSFELLHAPAT           | 192 |

**Supplementary Figure 2.** Sequence alignment of SARS-CoV-2 wt and SARS-CoV-2 (B.1.351) RBD (S1 subunit) proteins. All the other details are as in Fig. S1.

## Sequences alignment of SARS-CoV-1 and SARS-CoV-2' RBD (S1 subunit) proteins

|                      |     |                                                     |     |
|----------------------|-----|-----------------------------------------------------|-----|
| SARS-CoV-1           | 1   | ----CPFGEVFNATKFPVYAWERKKISNCVADYSVLYNSTFFSTFKCYG   | 46  |
|                      |     | : .     .  :                                        |     |
| SARS-CoV-2 (B.1.351) | 1   | ITNLCPFGEVFNATRFASVYAWNRRKISNCVADYSVLYNSASFSTFKCYG  | 50  |
| SARS-CoV-1           | 47  | VSATKLNLDLCTSNVIYADSFVVKGDVVRQIAPGQTVIADYNYKLPDDFMS | 96  |
|                      |     | .     :     : : :                                   |     |
| SARS-CoV-2 (B.1.351) | 51  | VSPTKLNLDLCTNVIYADSFVIRGDEVRQIAPGQTGNIADYNYKLPDDFTG | 100 |
| SARS-CoV-1           | 97  | CVLAWNTRNIDATSTGNVNYKYRFLRHGKLRPFERDISNVPPSPDGKPCF  | 146 |
|                      |     | :    : : : ...   ... : : :                          |     |
| SARS-CoV-2 (B.1.351) | 101 | CVIAWNSNNLDSKVGGNVNYLYRFRKSNLKPFERDISTEIQAGSTPCN    | 150 |
| SARS-CoV-1           | 147 | -PPALNCYWPLNDYGFYTTTGIGYQPYRVVLSFE-----             | 180 |
|                      |     | ...   : ...   ... : :                               |     |
| SARS-CoV-2 (B.1.351) | 151 | GVKGFNCYFPLQSYGFQPTYGVGYQPYRVVLSFELLHAPAT           | 192 |

**Supplementary Figure 3.** Sequence alignment of SARS-CoV-1 and SARS-CoV-2 (B.1.351) RBD (S1 subunit) proteins. All the other details are as in Fig. S1.

### 1.1.2 RBD-ACE2 Complexation

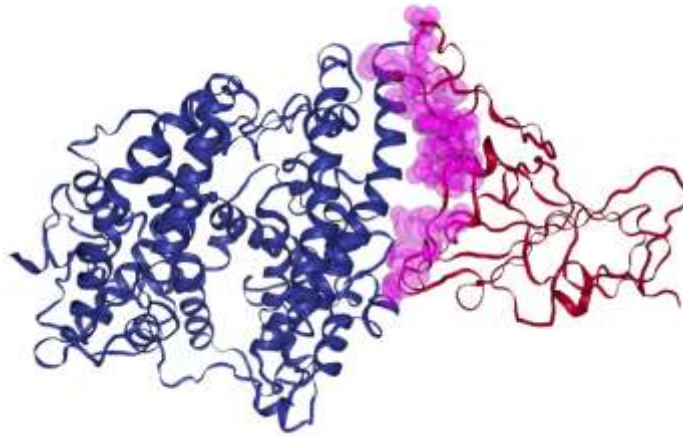

**Supplementary Figure 4.** Molecular structures of the SARS-CoV-2 S RBD complexed with ACE2. For better visualization of the epitope-paratope interface, the interface residues on the RBD were represented as overpost pink spheres. Interface residues are defined as residues whose atoms are within a distance of 5 Angstroms from other atoms of the neighboring chains. Red represents RBD on SARS-CoV-2 and the blue represents the receptor ACE2 (PDB id 6LZG). The image was generated by CoV3D (90).

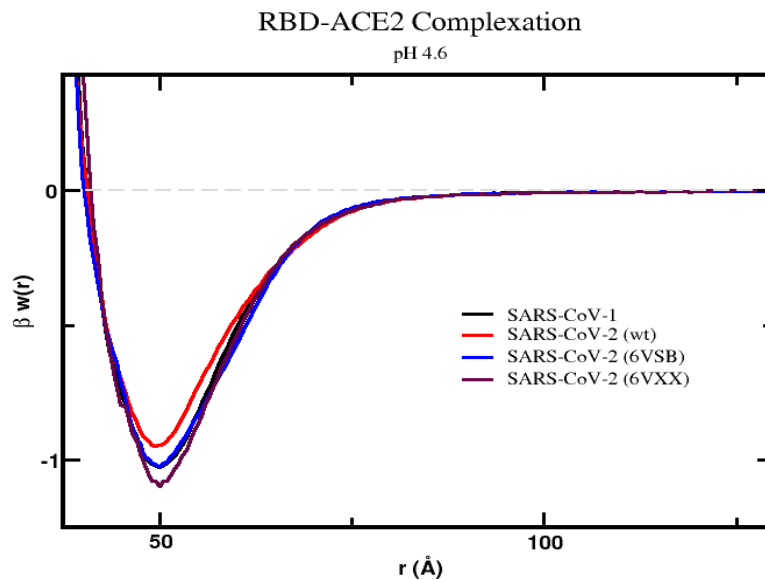

**Supplementary Figure 5.** Free energy profiles for the interaction of RBD proteins obtained from different structural data with the cellular receptor ACE2. The simulated free energy of interactions [ $\beta w(r)$ ] between the centers of the RBD proteins from SARS-CoV-1 and different coordinates for the SARS-CoV-2 wildtype interacting with the cellular receptor ACE2 are given at pH 4.6. The source of the three dimensional structures of these proteins are explained in the text and referred as RBD1<sub>wt</sub>, RBD2<sub>wt</sub>, RBD2<sub>wt</sub>(6VSB), and RBD2<sub>wt</sub>(6VXX), respectively. The plots for RBD1<sub>wt</sub> and RBD2<sub>wt</sub> correspond to the same ones already given in Figure 2. Salt concentration was fixed at 150 mM. Simulations started with the two molecules placed at random orientation and separation distance. Results for SARS-CoV-1, SARS-CoV-2 (wt), SARS-CoV-2 (wt with RBD from PDB id 6SVB), and SARS-CoV-2 (wt with RBD from PDB id 6SXX) are shown as black, red, dark blue, and marron continuous lines, respectively.

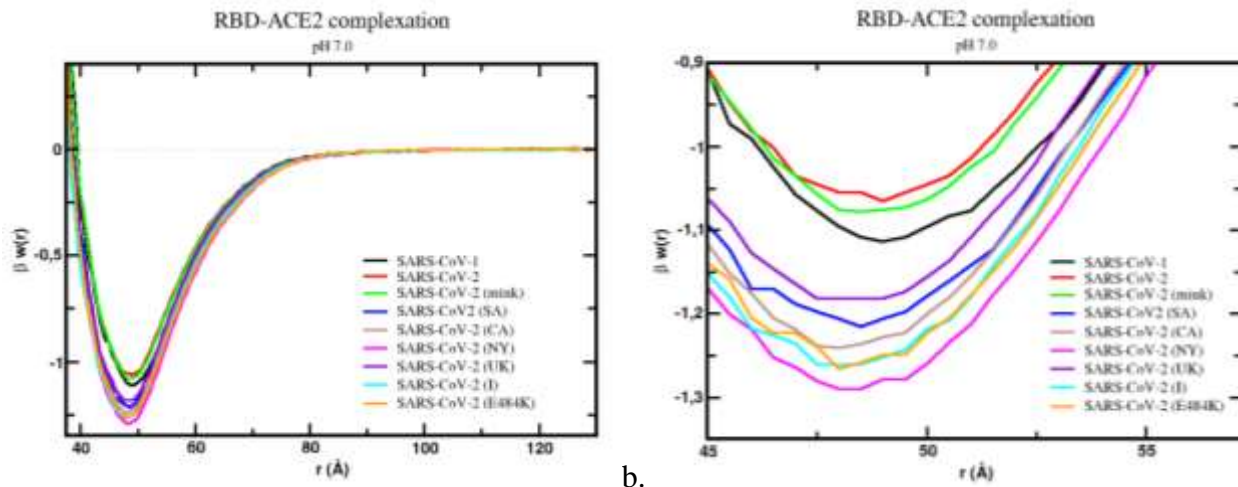

**Supplementary Figure 6. Free energy profiles for the interaction of RBD proteins with the cellular receptor ACE2.** The simulated free energy of interactions [ $\beta w(r)$ ] between the centers of the RBD proteins from SARS-CoV-1, SARS-CoV-2 (wt), SARS-CoV-2 (mink), SARS-CoV-2 (SA), SARS-CoV-2 (CA), SARS-CoV-2 (NY), SARS-CoV-2 (UK), SARS-CoV-2 (I), and SARS-CoV-2 (E484K) and the cellular receptor ACE2 are given at pH 7.0. The source of the three-dimensional structures of these proteins are explained in the text and referred as RBD1<sub>wt</sub>, RBD2<sub>wt</sub>, RBD2<sub>m</sub>, RBD2<sub>SA</sub>, RBD2<sub>CA</sub>, RBD2<sub>NY</sub>, RBD2<sub>UK</sub>, RBD2<sub>I</sub>, and RBD2<sub>E484K</sub>, respectively. Salt concentration was fixed at 150 mM. Data for the complexes with the wildtype proteins (RBD1<sub>wt</sub>-ACE2 and RBD2<sub>wt</sub>-ACE2) was given before (43). Simulations started with the two molecules placed at random orientation and separation distance. Results for SARS-CoV-1, SARS-CoV-2 (wt), SARS-CoV-2 (mink), SARS-CoV-2 (SA), SARS-CoV-2 (CA), SARS-CoV-2 (NY), SARS-CoV-2 (UK), SARS-CoV-2 (I), and SARS-CoV-2 (E484K) are shown as black, red, green, blue, dark purple, pink, light purple, cyan, and orange continuous lines, respectively. (a) *Left panel*: Full plot. (b) *Right panel*: The well depth region of the  $\beta w(r)$  for each studied complex.

### 1.1.3 Key-mutations

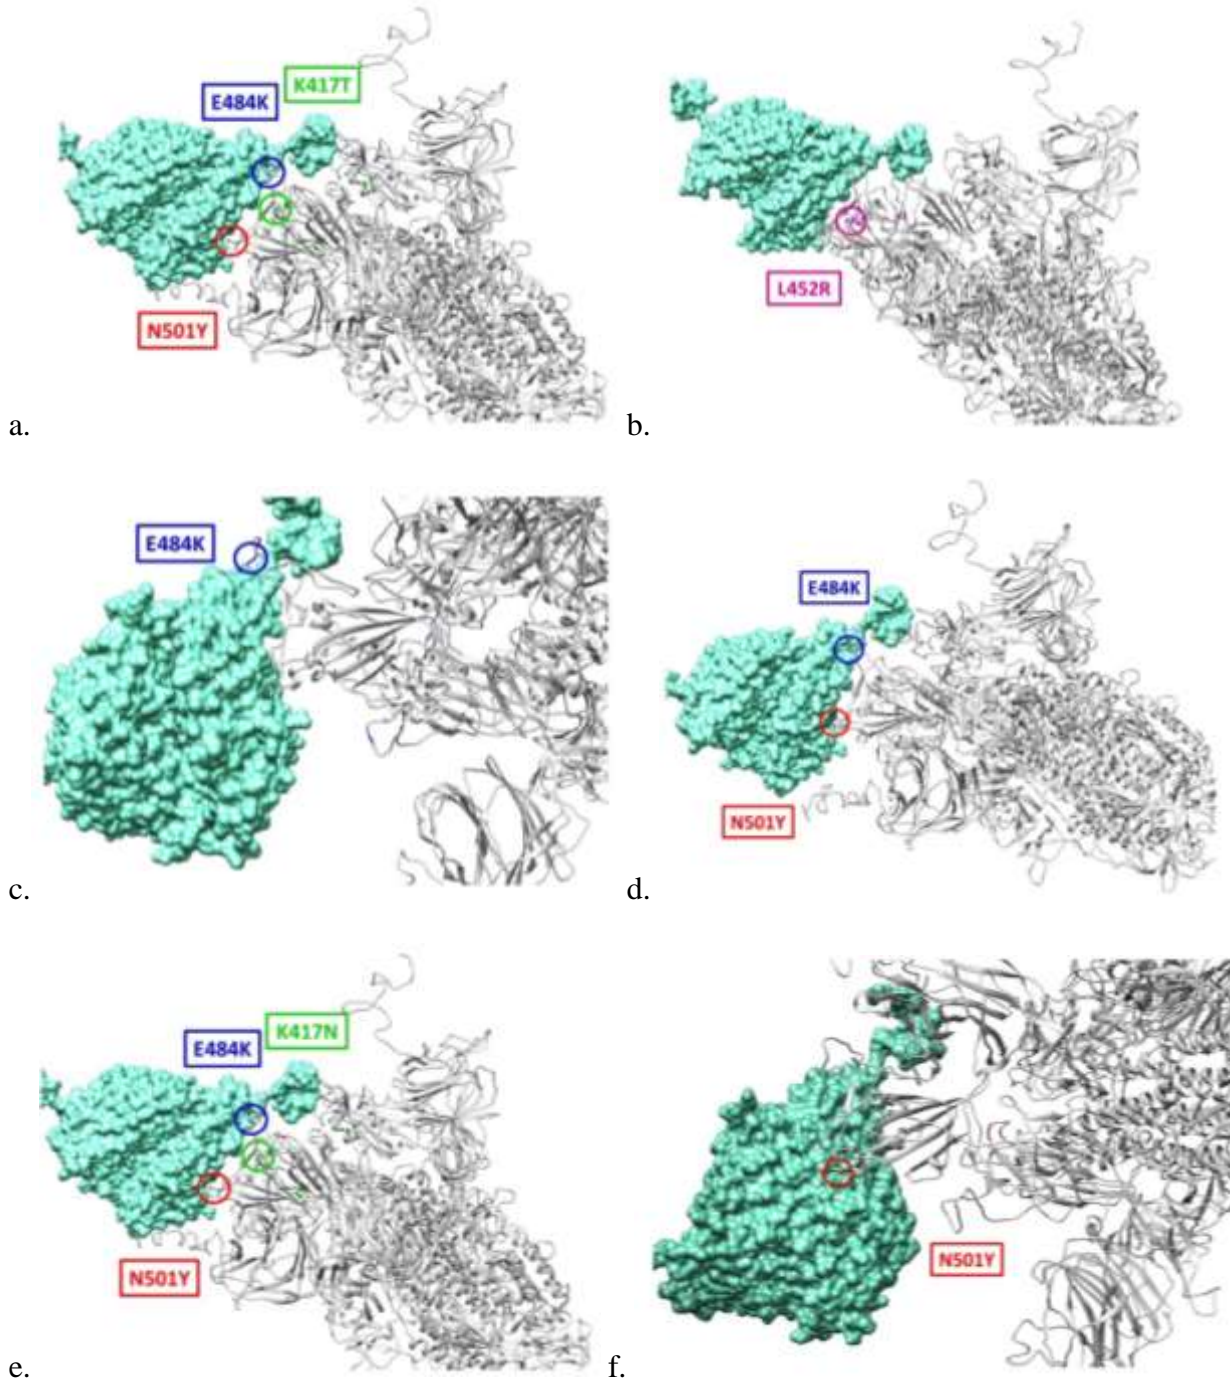

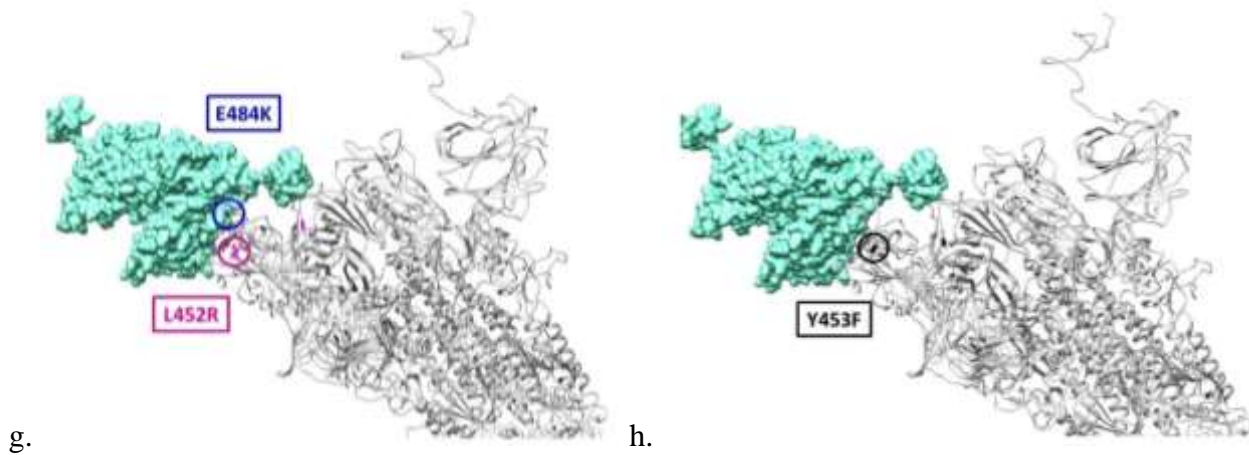

**Supplementary Figure 7.** Molecular structures of the different variants of SARS-CoV-2 Spike complexed with ACE2. The aquamarine surface represents the receptor ACE2 and the grey ribbon represents the Spike homotrimer protein (PDB id 7A94). For better visualization of the epitope-paratope interface, the Spike was maximized and the ribbon was partially represented and the key-mutations for each variant were highlighted. The 8 images represent the variants: (a) Brazilian P.1, (b) Californian, (c) isolated E484K mutations, (d) the New York, (e) South-African, (f) UK variant, (g) Indian double mutations and (h) SARS-CoV-2 mink-associated variant strain. The Spike residue N501 is shown in red, E484 in blue, K417 in green, L452 in magenta and Y453 in black. The image was generated by UCSF Chimera (73). All used RBD structures are available at Zenodo (<https://doi.org/10.5281/zenodo.4780600>).



## 1.1.4 Main Conclusions

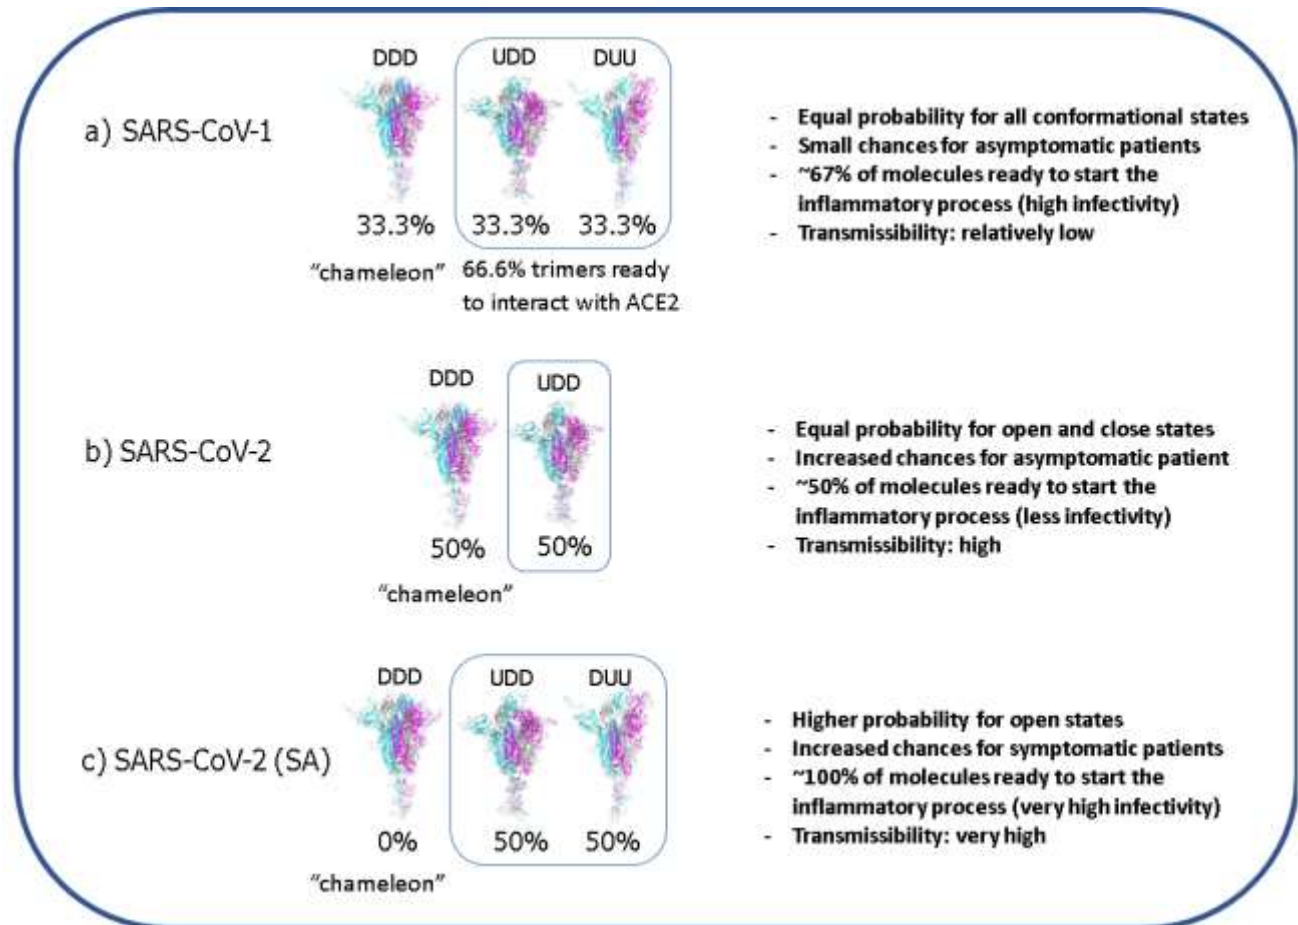

**Supplementary Figure 8.** Schematic representation for the main conclusions. The three sets show the probability that SARS-CoV-1 (a), SARS-CoV-2 (b) and SARS-CoV-2 (SA) (c) have for all conformational states (DDD, UDD and DUU) at the highest stability conditions and their possible relations with clinical aspects. The illustrative images of the spike homotrimers were generated by UCSF Chimera (PDB id 6VXX, 6VSB and 7A93 for the states DDD, UDD and DUU, respectively) (73).



## 1.2 Supplementary tables

**Supplementary Table 1.** Main physical chemical properties of the RBDs of different new variants. These results were obtained by the FPTs at physiological salt concentration. See the text for more details.

|        | Charges numbers for different protein structures |                   |                    |                    |                    |                    |                    |                   |
|--------|--------------------------------------------------|-------------------|--------------------|--------------------|--------------------|--------------------|--------------------|-------------------|
|        | RBD2 <sub>wt</sub>                               | RBD2 <sub>m</sub> | RBD2 <sub>SA</sub> | RBD2 <sub>BR</sub> | RBD2 <sub>CA</sub> | RBD2 <sub>NY</sub> | RBD2 <sub>UK</sub> | RBD2 <sub>I</sub> |
| pH 4.6 | 5.5                                              | 5.5               | 6.2                | 6.2                | 6.4                | 7.1                | 5.5                | 7.0               |
| pH 7.0 | 2.2                                              | 2.2               | 3.2                | 3.2                | 3.1                | 4.1                | 2.1                | 4.1               |
|        | Dipole moment numbers for the same structures    |                   |                    |                    |                    |                    |                    |                   |
| pH 4.6 | 35                                               | 35                | 65                 | 65                 | 40                 | 71                 | 35                 | 53                |
| pH 7.0 | 31                                               | 31                | 82                 | 82                 | 43                 | 90                 | 31                 | 71                |

**Supplementary Table 2. Detailed data for the mapping of EE for the RBD at different conformational states of the spike homotrimer.** The EE were predicted by the PROCEEDpKa method for the RBD of SARS-CoV-2 wt out of the homotrimer (as given in Figure 3). Exposed and hidden residues were identified by the on-line server “PDBePISa” (90) with default options. PDB ids 6VXX and 6VSB were used in this analysis.

A) EEs exposed to the solvent and available to directly interact with the receptor ACE2 for chain A of Spike RBD (PDB id 6VSB).

| Spike RBD EE - Chain A<br>(NEE=32) (NHE=6) ( <i>up</i> ) |      |      |      |
|----------------------------------------------------------|------|------|------|
| E340                                                     | K386 | D427 | E465 |
| R346                                                     | D389 | D428 | R466 |
| Y351                                                     | Y396 | D442 | D467 |
| R355                                                     | R403 | K444 | Y473 |
| K356                                                     | D405 | Y449 | Y489 |
| R357                                                     | R408 | Y451 | Y495 |
| Y365                                                     | K417 | Y453 | Y505 |
| Y369                                                     | D420 | R457 | Y508 |
| K378                                                     | Y421 | K458 | R509 |
| Y380                                                     | Y423 | K462 | H519 |

B) EEs exposed to the solvent and available to directly interact with the receptor ACE2 for chain B of Spike RBD (PDB id 6VSB).

| Spike RBD EE - Chain B<br>(NEE=28) (NHE=11) ( <i>down</i> ) |      |      |      |
|-------------------------------------------------------------|------|------|------|
| E340                                                        | K386 | D427 | E465 |
| R346                                                        | D389 | D428 | R466 |
| Y351                                                        | Y396 | D442 | D467 |
| R355                                                        | R403 | K444 | Y473 |

|      |      |      |      |
|------|------|------|------|
| K356 | D405 | Y449 | Y489 |
| R357 | R408 | Y451 | Y495 |
| Y365 | K417 | Y453 | Y505 |
| Y369 | D420 | R457 | Y508 |
| K378 | Y421 | K458 | R509 |
| Y380 | Y423 | K462 | H519 |

C) EEs exposed to the solvent and available to directly interact with the receptor ACE2 for chain C of Spike RBD (PDB id 6VSB).

| Spike RBD EE - Chain C<br>(NEE=30) (NHE=10) ( <i>down</i> ) |      |      |      |
|-------------------------------------------------------------|------|------|------|
| E340                                                        | K386 | D427 | E465 |
| R346                                                        | D389 | D428 | R466 |
| Y351                                                        | Y396 | D442 | D467 |
| R355                                                        | R403 | K444 | Y473 |
| K356                                                        | D405 | Y449 | Y489 |
| R357                                                        | R408 | Y451 | Y495 |
| Y365                                                        | K417 | Y453 | Y505 |
| Y369                                                        | D420 | R457 | Y508 |
| K378                                                        | Y421 | K458 | R509 |
| Y380                                                        | Y423 | K462 | H519 |

D) EEs exposed to the solvent and available to directly interact with the receptor ACE2 for chain A of Spike RBD (PDB id 6VXX).

| Spike RBD EE - Chain A<br>(NEE=20) (NHE=20) ( <i>down</i> ) |      |      |      |
|-------------------------------------------------------------|------|------|------|
| E359                                                        | K405 | D446 | E484 |

|      |      |      |      |
|------|------|------|------|
| R365 | D408 | D447 | R485 |
| Y370 | Y415 | D461 | D486 |
| R374 | R422 | K463 | Y492 |
| K375 | D424 | Y468 | Y508 |
| R376 | R427 | Y470 | Y514 |
| Y384 | K436 | Y472 | Y524 |
| Y388 | D439 | R476 | Y527 |
| K397 | Y440 | K477 | R528 |
| Y399 | Y442 | K481 | H538 |

E) EEs exposed to the solvent and available to directly interact with the receptor ACE2 for chain B of Spike RBD (PDB id 6VXX).

| Spike RBD EE - Chain B<br>(NEE=24) (NHE=15) ( <i>down</i> ) |      |      |      |
|-------------------------------------------------------------|------|------|------|
| E359                                                        | K405 | D446 | E484 |
| R365                                                        | D408 | D447 | R485 |
| Y370                                                        | Y415 | D461 | D486 |
| R374                                                        | R422 | K463 | Y492 |
| K375                                                        | D424 | Y468 | Y508 |
| R376                                                        | R427 | Y470 | Y514 |
| Y384                                                        | K436 | Y472 | Y524 |
| Y388                                                        | D439 | R476 | Y527 |
| K397                                                        | Y440 | K477 | R528 |
| Y399                                                        | Y442 | K481 | H538 |

F) EEs exposed to the solvent and available to directly interact with the receptor ACE2 for chain C of Spike RBD (PDB id 6VXX).

| Spike RBD EE - Chain C<br>(NEE=25) (NHE=15) ( <i>down</i> ) |      |      |      |
|-------------------------------------------------------------|------|------|------|
| E359                                                        | K405 | D446 | E484 |
| R365                                                        | D408 | D447 | R485 |
| Y370                                                        | Y415 | D461 | D486 |
| R374                                                        | R422 | K463 | Y492 |
| K375                                                        | D424 | Y468 | Y508 |
| R376                                                        | R427 | Y470 | Y514 |
| Y384                                                        | K436 | Y472 | Y524 |
| Y388                                                        | D439 | R476 | Y527 |
| K397                                                        | Y440 | K477 | R528 |
| Y399                                                        | Y442 | K481 | H538 |

Legend

|            |                                                                     |
|------------|---------------------------------------------------------------------|
|            | Solvent-accessible residues                                         |
|            | Inaccessible residues                                               |
|            | Interfacing residues (AxB)                                          |
|            | Interfacing residues (AxC)                                          |
|            | Interfacing residues (BxC)                                          |
| <b>NEE</b> | Number of exposed epitopes                                          |
| <b>NHE</b> | Number of hidden epitopes (due to the interface with another chain) |
